# Supplementary material
Source: publisher figshare collection journal article supplement (https://acs.figshare.com/ndownloader/files/3708694)
Supplement: Supplementary file 1 [file 3708694]

*Supporting Information*

**Secondary Structures in a Freeze-Dried Lignite Humic Acid Fraction Caused by Hydrogen-Bonding of Acidic Protons with Aromatic Rings**

Xiaoyan Cao<sup>1</sup>, Marios Drosos<sup>2</sup>, Jerry A. Leenheer<sup>3</sup>, and Jingdong Mao<sup>1,\*</sup>

<sup>1</sup>Department of Chemistry and Biochemistry, Old Dominion University, 4541 Hampton Blvd,  
Norfolk, Virginia 23529, USA

<sup>2</sup>Centro Interdipartimentale di Ricerca sulla Risonanza Magnetica Nucleare per l' Ambiente, l' Agroalimentare ed i Nuovi Materiali (CERMANU), Università di Napoli "Federico II", Via  
Università 100, 80055 Portici, Italy

<sup>3</sup>4024 Douglas Mountain Drive, Golden, Colorado 80403, USA

Manuscript prepared for *Environmental Science & Technology*

\*Author to whom correspondence should be addressed:

Jingdong Mao, e-mail: jmao@odu.edu; phone: 757-683-6874; fax: 757-683-4628.

## **MATERIALS AND METHODS**

A  $^{13}\text{C}$  chemical shift anisotropy (CSA) filter was inserted to the multiCP sequence to distinguish components with different chemical shift anisotropies. The multiCP sequence was also combined with recoupled long-range dipolar dephasing to probe the distances between  $^{13}\text{C}$  nuclei and their nearest protons.

**Table S1.** Functional group composition (%) of LC2 based on  $^{13}\text{C}$  multiCP NMR.

| Sample | ppm     |                 |           |                         |       |                           |         |
|--------|---------|-----------------|-----------|-------------------------|-------|---------------------------|---------|
|        | 215-185 | 185-160         | 160-140   | 140-95                  | 95-65 | 65-50                     | 50-0    |
|        | Ketone  | O-C=O,<br>N-C=O | Arom. C-O | Arom. C-C,<br>Arom. C-H | OC    | OCH <sub>3</sub> ,<br>NCH | Alkyl C |
| LC2    | 3.0     | 12.7            | 15.6      | 42.2                    | 6.3   | 5.3                       | 14.9    |
| Lignin | 4.1     | 5.2             | 21.0      | 29.1                    | 6.4   | 12.8                      | 21.5    |

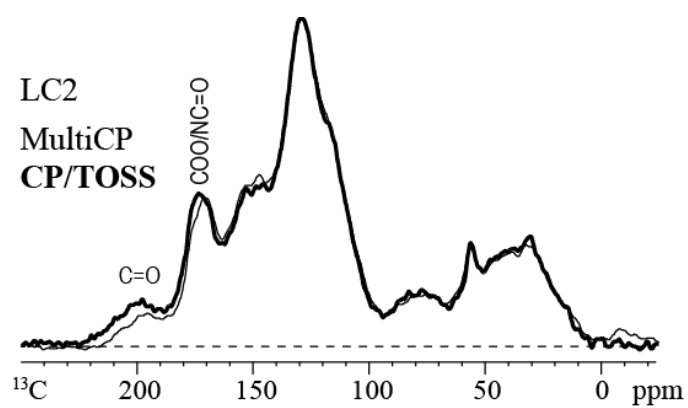

Figure S1.  $^{13}\text{C}$  spectra of LC2 obtained by multiple cross polarization (multiCP, thin line) and  $^{13}\text{C}$  cross polarization total sideband suppression (CP/TOSS, bold line).

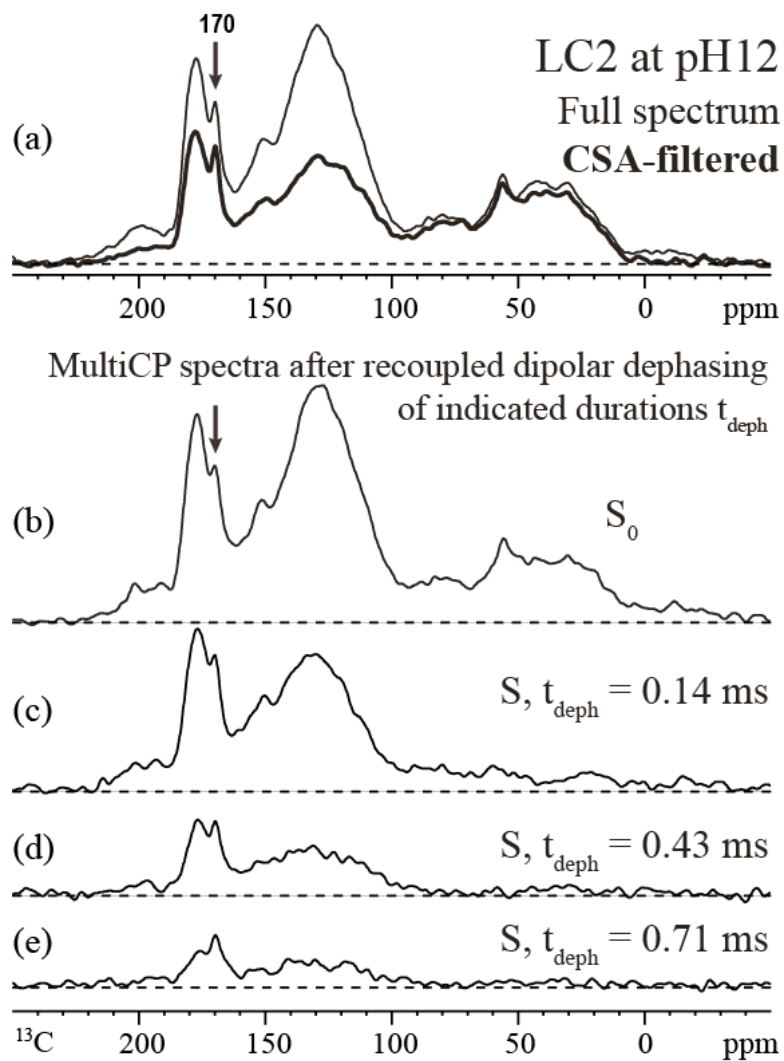

Figure S2. (a)  $^{13}\text{C}$  multiCP NMR spectra of LC2 potassium salt (at pH 12) before (thin line) and after inserting a CSA filter (bold line,  $t_{\text{CSA}} = 68 \mu\text{s}$ ). (b-e)  $^{13}\text{C}$  multiCP NMR spectra of LC2 potassium salt (at pH 12) after recoupled long-range dipolar dephasing of indicated durations.

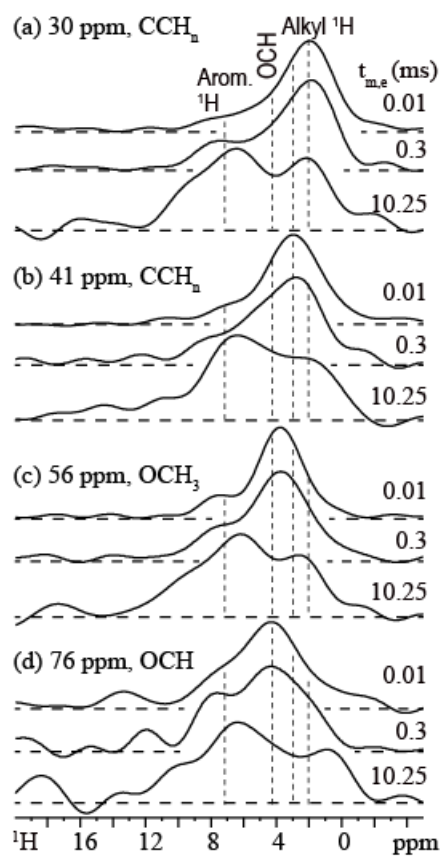

Figure S3. The  $^1\text{H}$  spectra extracted at different  $^{13}\text{C}$  chemical shifts at different mixing times from 2D HETCOR NMR spectra of LC2.

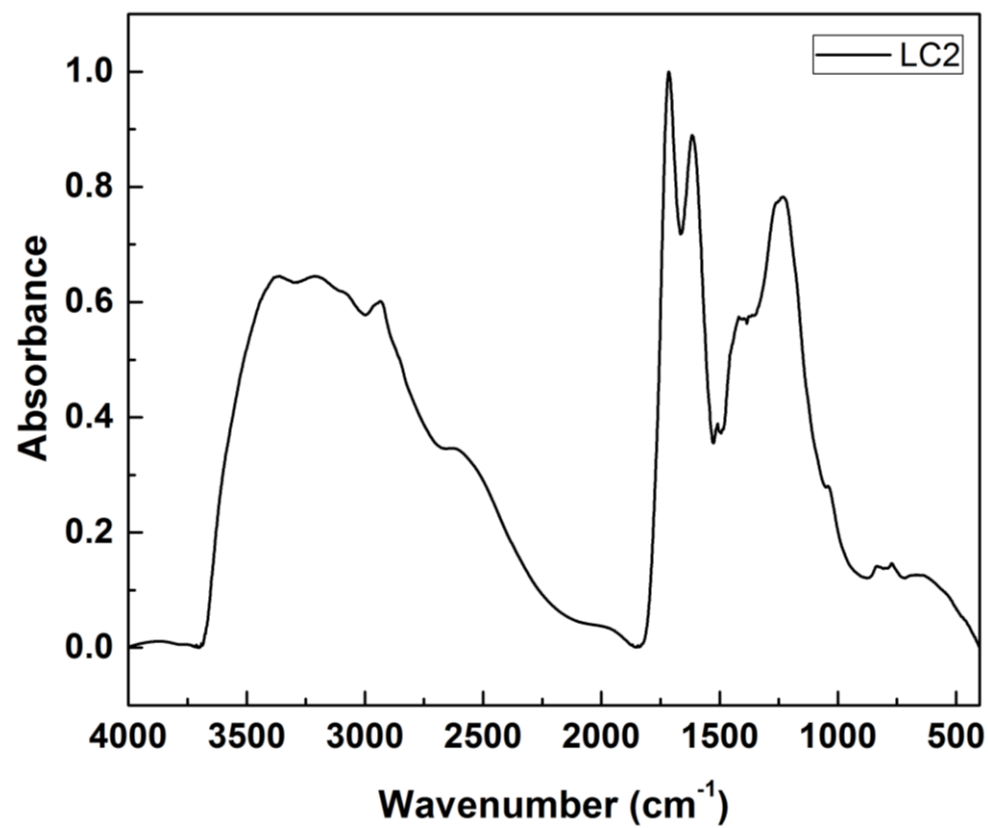

Figure S4. FT-IR spectrum of LC2.
